# Supplementary material for: Prospection of Psychrotrophic Filamentous Fungi Isolated from the High Andean Paramo Region of Northern Ecuador: Enzymatic Activity and Molecular Identification
Source: MDPI journal article supplement (doi:10.3390/microorganisms10020282), 2022-01-26
Supplement: s1 [file s1]

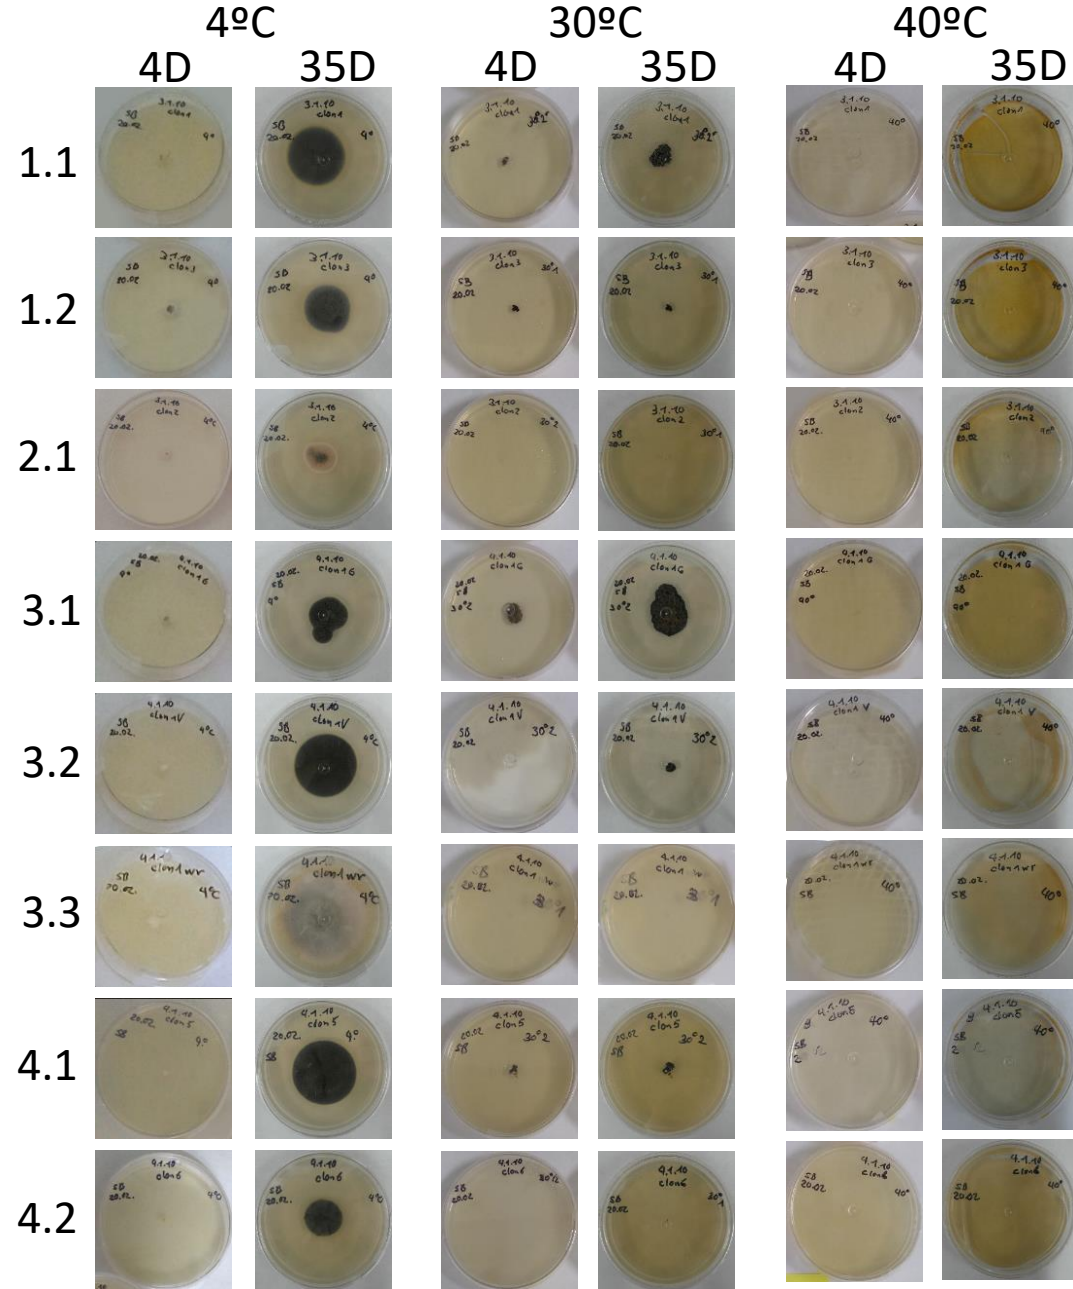

**Supplementary Figure S1:** Growth of 8 different isolated fungal strains from 4 different sampling sites after 4 and 35 days (D) at different temperatures.

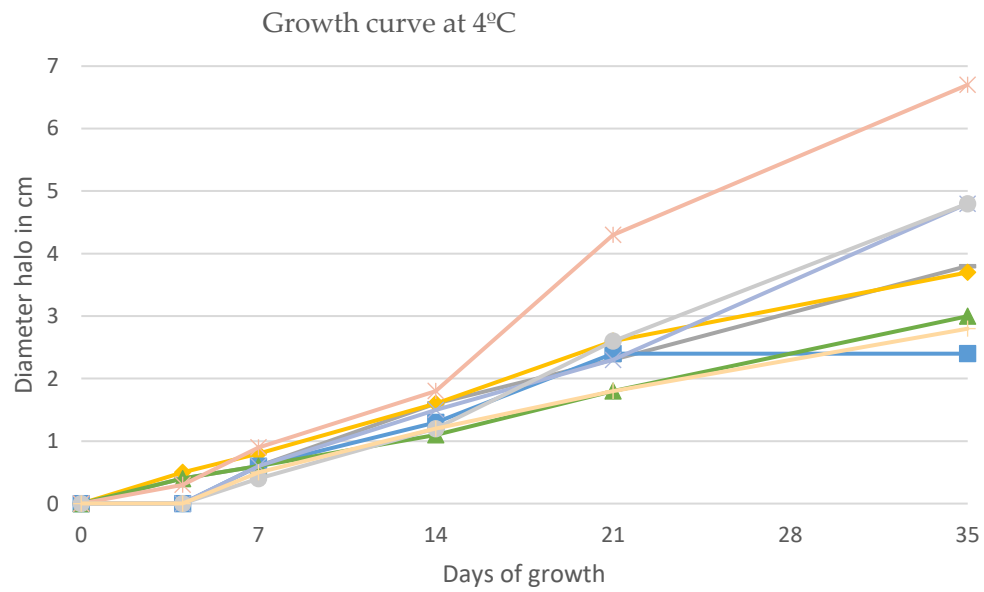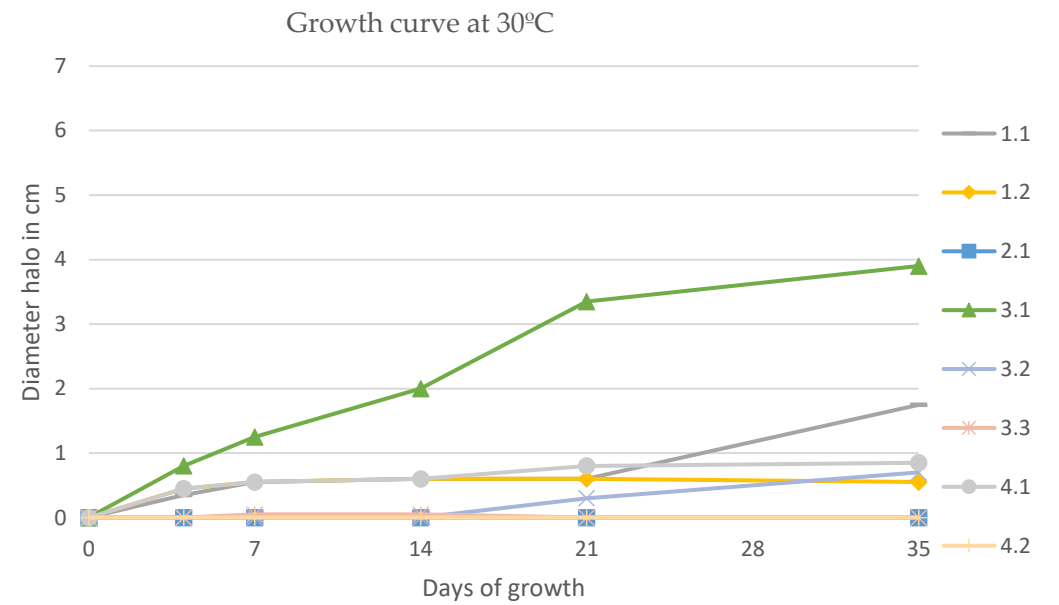

**Supplementary Figure S2.** Growth curves of isolated fungal strains at 4°C and 30°C.

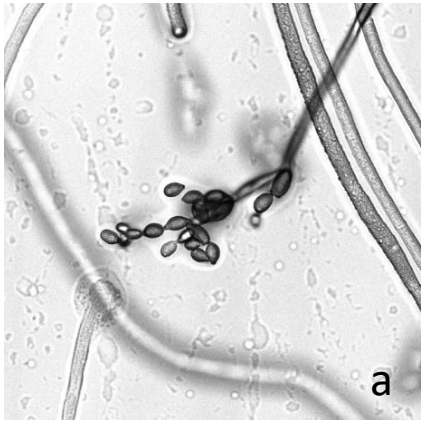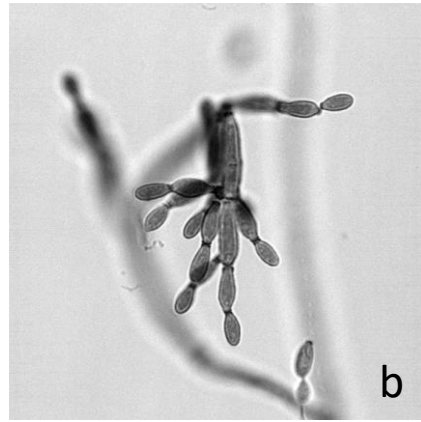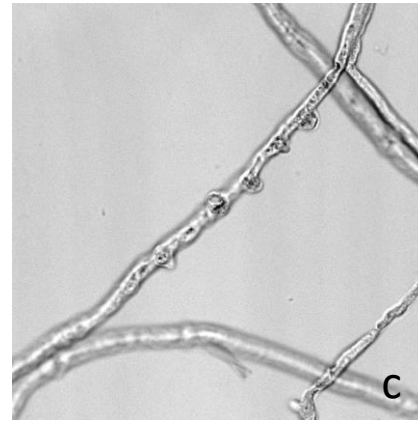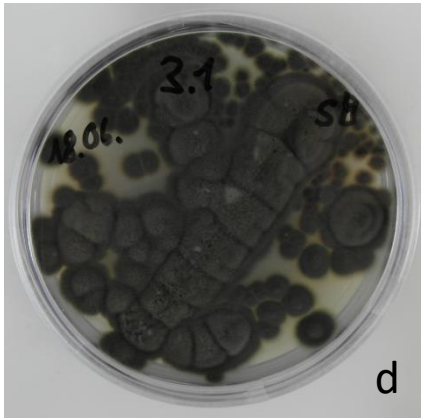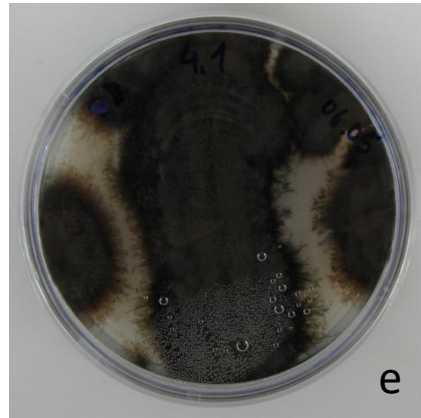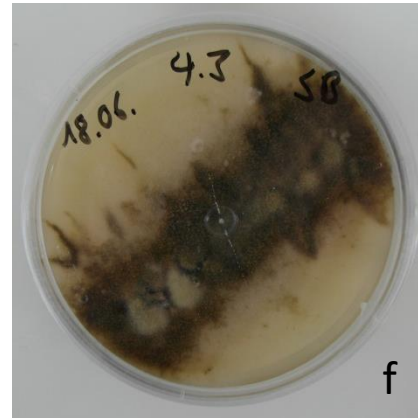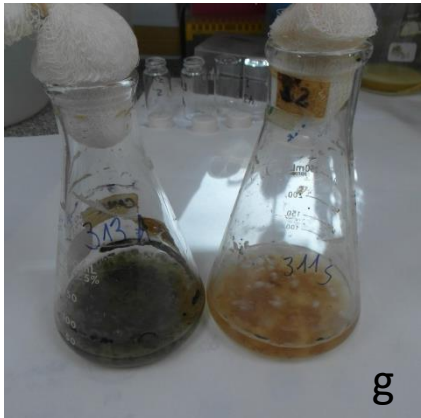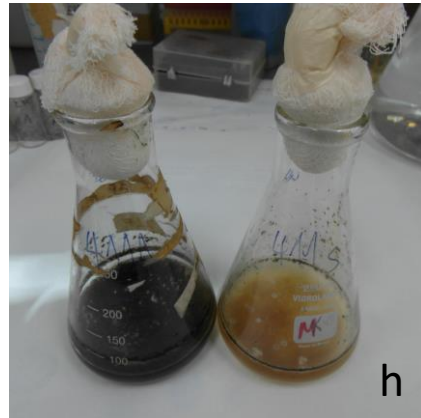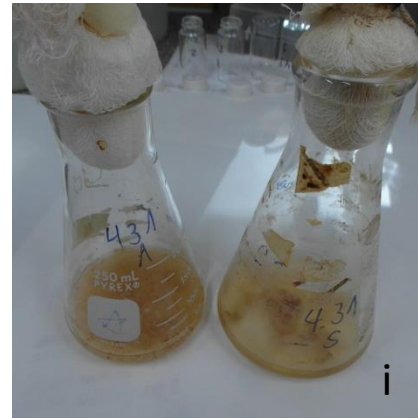

**Supplementary Figure S3:** Selected and identified fungi, from left to right *Cladosporium michoacanense* (a, d, g), *Cladosporium* sp. (*cladosporioides* species complex)(b, e, h), *Didymella* sp. (c, f, i); top microscopy of sporangium and micelia (a-c), middle row cultures on Potato Dextrose Agar (d-f) and bottom row comparison of shaken culture versus static culture (g-i).

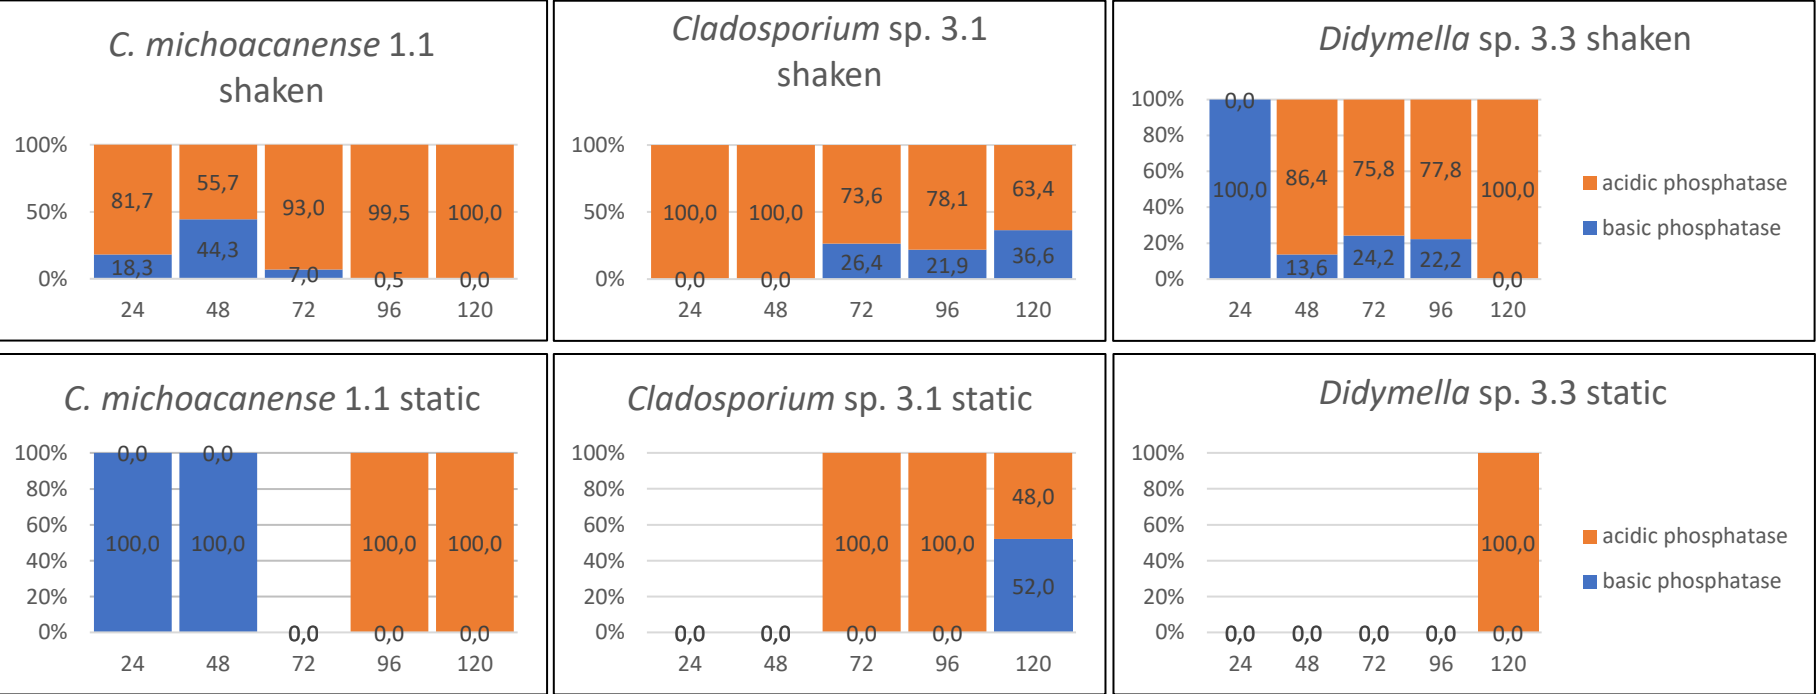

**Supplementary Figure S4:** Relative phosphate activity over time comparing acidic phosphatase versus alkaline phosphatase

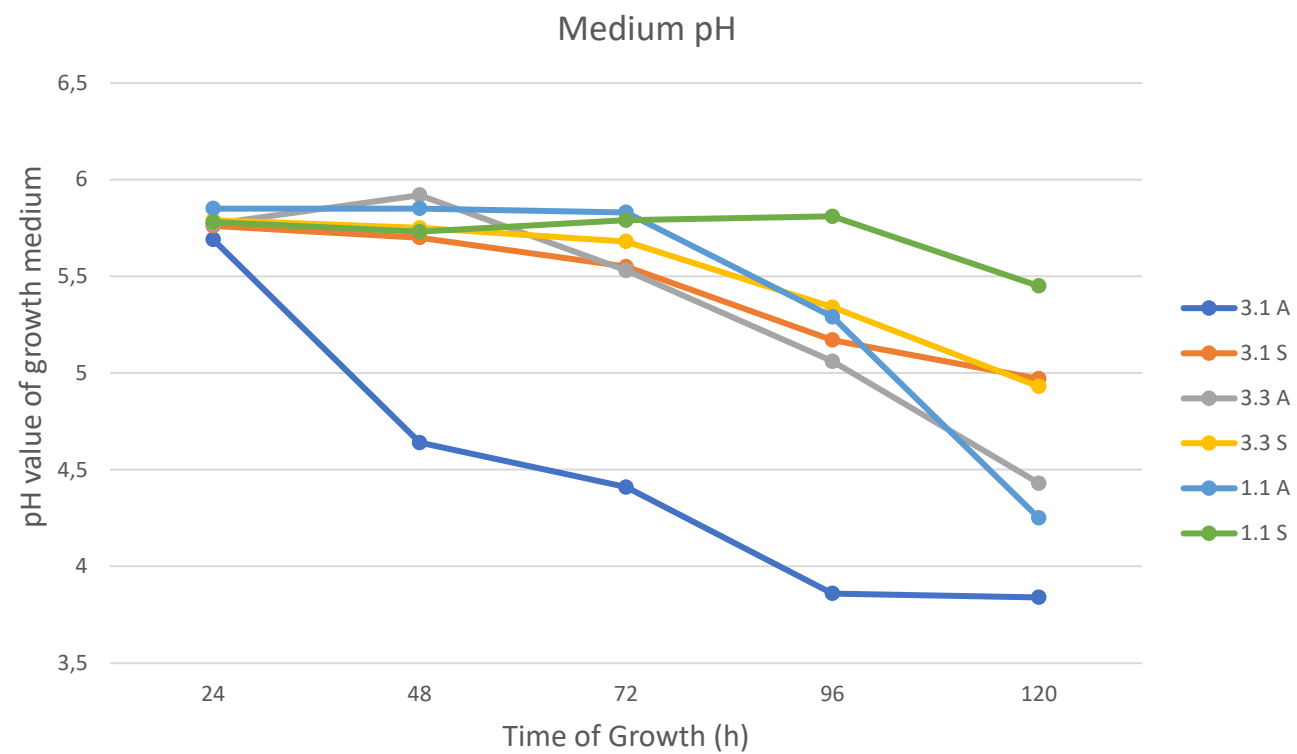

**Supplementary Figure S5:** Development of growth medium pH over time in cultures under agitation (A) and static (S) conditions for strain 1.1, 3.1 and 3.3

**Supplementary Table S1:** Sampling site characteristics

| <b>Sampling site</b> | <b>Coordinates</b>        | <b>Altitude</b> | <b>Temperature (Ø)</b> | <b>Predominant vegetation</b>                 | <b>N° of chosen isolates</b> |
|----------------------|---------------------------|-----------------|------------------------|-----------------------------------------------|------------------------------|
| 1                    | Sº 78.701786; Wº 0.631899 | 3986            | 9.966                  | Poaceae. Asteraceae.<br>Verbenaceae. Rosaceae | 2                            |
| 2                    | Sº 78.702426; Wº 0.631899 | 3998            |                        |                                               | 1                            |
| 3                    | Sº 78.706805; Wº 0.636392 | 4145            | 9.552                  | Poaceae. Apiaceae.<br>Rosaceae                | 3                            |
| 4                    | Sº 78.706972; Wº 0.63616  | 4149            |                        |                                               | 2                            |
